# Supplementary material for: Two transposable element insertions are causative mutations for the major domestication gene teosinte branched 1 in modern maize
Source: PubMed Central journal article supplement — Cell Res. 2011 Jun 21;21(8):1267–70. doi: 10.1038/cr.2011.104 (PMC3193476; doi:10.1038/cr.2011.104), 2011-06-21

Supplementary figure 3

A: Detection of retrotransposon in 539 maize lines.

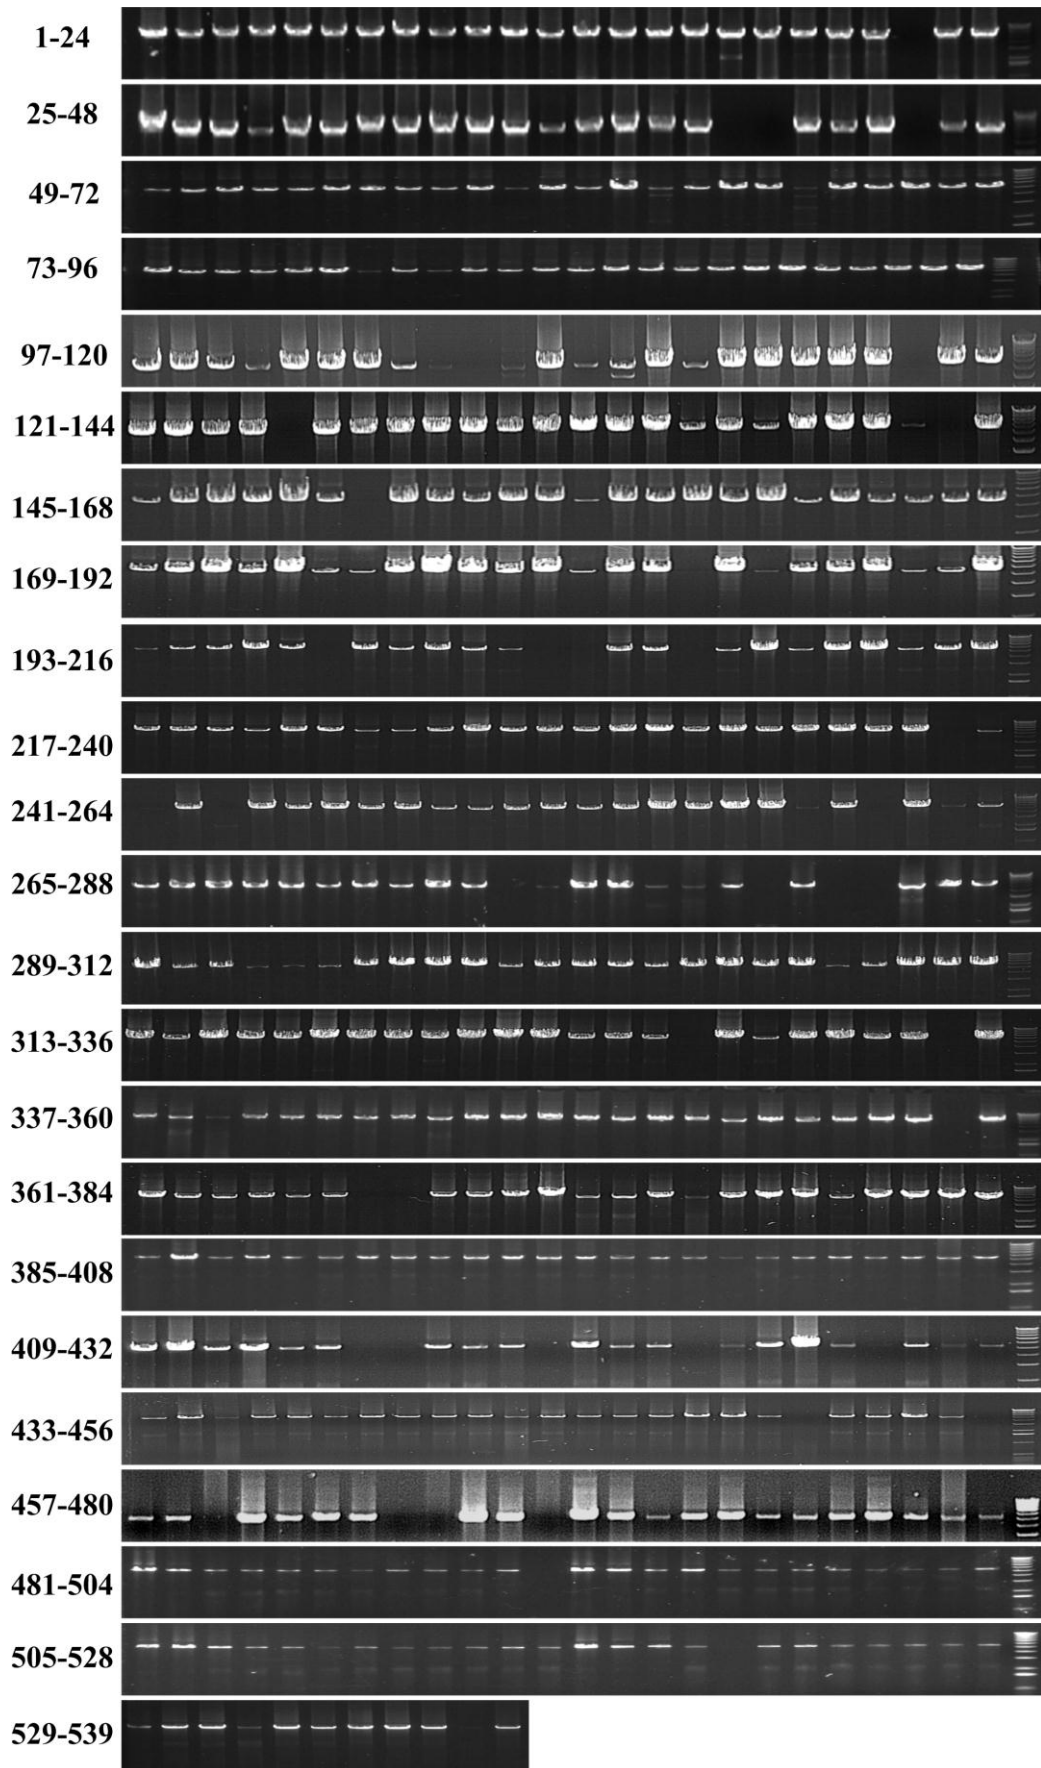

B. Detection of MITE in 539 maize lines.

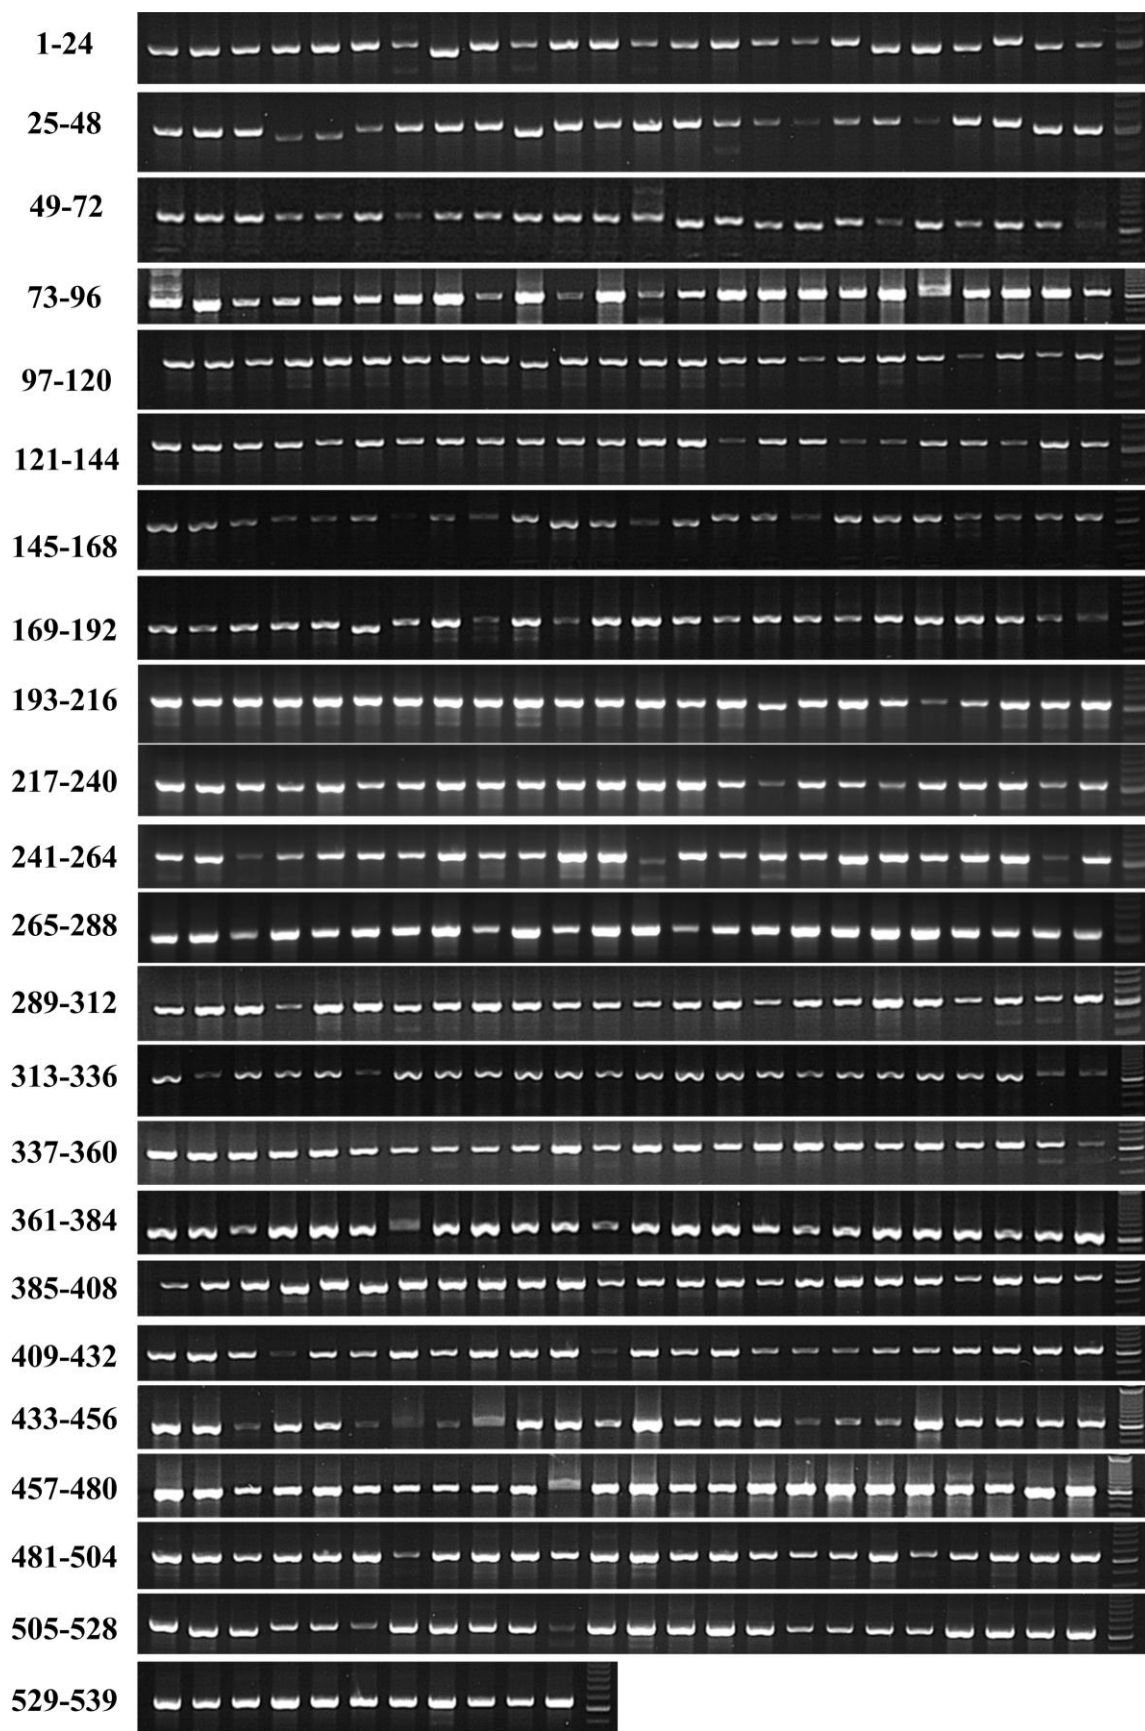

C. Detection of retrotransposon in 189 teosinte lines.

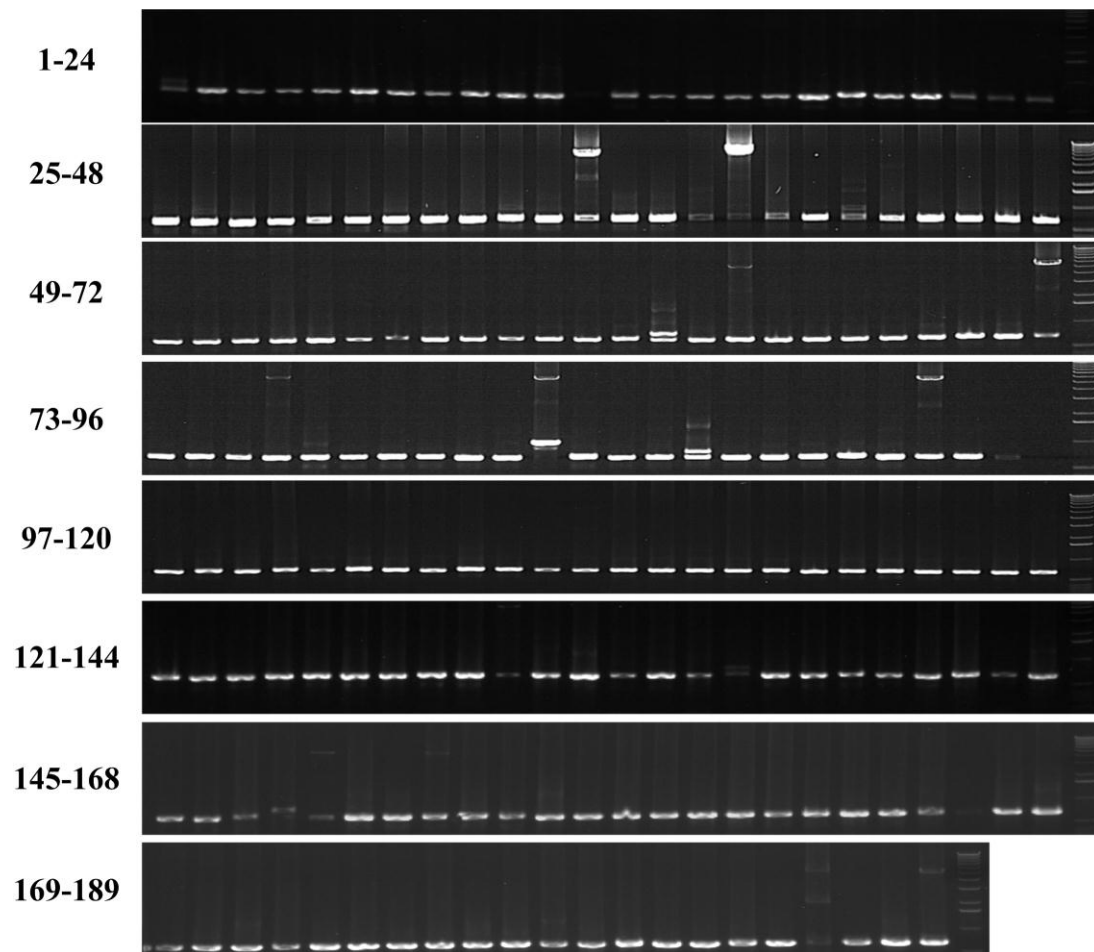

D. Detection of MITE in 189 teosinte lines.

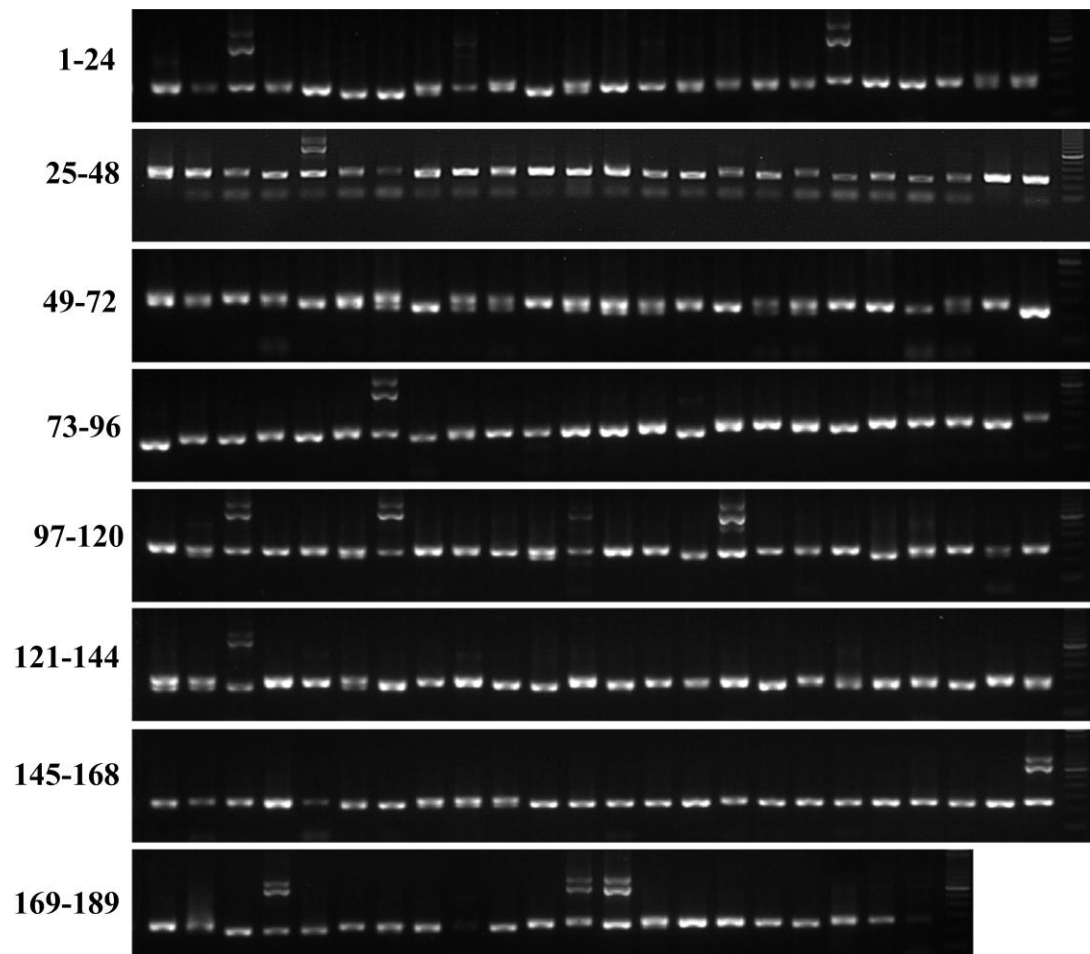

Supplement: cr2011104x4.pdf [file cr2011104x4.pdf]
